1 Intronic non-coding RNAs within ribosomal protein coding genes can regulate biogenesis of  
2 yeast ribosome

3 Akshara Pande<sup>1,2</sup>, Rani Sharma<sup>1</sup>, Bharat Ravi Iyengar<sup>3,4</sup>, Vinod Scaria<sup>1,2</sup>, Beena Pillai<sup>1,2\*</sup>, Samir K  
4 Brahmachari<sup>1,2\*</sup>

5 <sup>1</sup>CSIR-Institute of Genomics and Integrative Biology (CSIR-IGIB), New Delhi, India

6 <sup>2</sup>Academy of Scientific and Innovative Research (AcSIR)

7 <sup>3</sup>CSIR-National Chemical Laboratory (CSIR-NCL), Pune, India

8 <sup>4</sup>Department of Chemical Engineering, IIT Bombay, Mumbai, India

9 [akshara.pande@igib.in](mailto:akshara.pande@igib.in), [07rani.sharma@gmail.com](mailto:07rani.sharma@gmail.com), [bharatravi.654@gmail.com](mailto:bharatravi.654@gmail.com), [vinods@igib.in](mailto:vinods@igib.in),  
10 [beena@igib.in](mailto:beena@igib.in), [skb@igib.in](mailto:skb@igib.in)

11 \*Corresponding authors: Beena Pillai, Samir K Brahmachari

12

13 **Abbreviations** ncRNA, non-coding RNA; isRNA, intronic small RNA; snoRNA, small nucleolar RNA;  
14 TF, transcription factor; Pre-rRNA, precursor ribosomal RNA; rDNA, ribosomal DNA; rRNA, ribosomal  
15 RNA; ITS, Internal Transcribed Spacer; ETS, External Transcribed Spacer; NTS, Non-Transcribed  
16 Spacer; nt, Nucleotide

17

## 18 **Abstract**

19 The genome of the budding yeast (*Saccharomyces cerevisiae*) has selectively retained introns in  
20 ribosomal protein coding genes. The function of these introns has remained elusive in spite of  
21 experimental evidence that they are required for the fitness of yeast. Here, we computationally predict

22 novel small RNAs that arise from the intronic regions of ribosomal protein (RP) coding genes in  
23 *Saccharomyces cerevisiae*. Further, we experimentally validated the presence of seven intronic small  
24 RNAs (isRNAs). Computational predictions suggest that these isRNAs potentially bind to the ribosomal  
25 DNA (rDNA) locus or the corresponding rRNAs. Several isRNA candidates can also interact with  
26 transcripts of transcription factors and small nucleolar RNAs (snoRNAs) involved in the regulation of  
27 rRNA expression. We propose that the isRNAs derived from intronic regions of ribosomal protein coding  
28 genes may regulate the biogenesis of the ribosome through a feed-forward loop, ensuring the coordinated  
29 regulation of the RNA and protein components of the ribosomal machinery. Ribosome biogenesis and  
30 activity are fine-tuned to the conditions in the cell by integrating nutritional signals, stress response and  
31 growth to ensure optimal fitness. The enigmatic introns of ribosomal proteins may prove to be a novel  
32 and vital link in this regulatory balancing act.

33 **Keywords:** small RNA, rDNA, intron, ribosome, non-coding RNA, rRNA

## 34 **Introduction**

35 All the 401 introns present in its genome (*Saccharomyces* Genome Database (SGD)) [1] are found within  
36 less than 370 (7%) of 6000 genes in the yeast, *Saccharomyces cerevisiae*. These include introns in  
37 snoRNAs, tRNAs and the mitochondrial genome, pushing the number of spliceosomal introns to a sheer  
38 281. In contrast, the closely related *Schizosaccharomyces pombe*, has an abundance of 4698 introns in  
39 2252 genes which constitutes about 45% of nearly 5000 genes in its genome (PomBase) [2]. Compared to  
40 other eukaryotic genomes of comparable size, the *Saccharomyces cerevisiae* genome is unusually intron  
41 free. In spite of this loss of introns in the majority of yeast genes [3], 104 (out of 281) spliceosomal  
42 introns are in ribosomal protein coding genes [4]. The *S. cerevisiae* genome contains 137 coordinately  
43 regulated ribosomal protein coding genes, 76% of which carry one or more introns. Evolutionary analysis  
44 of the yeast genome has shown that the *Saccharomyces* family (exemplified by *S. cerevisiae*) has lost  
45 introns extensively in spite of having intron rich ancestors [5]. This has led to the hypothesis that the  
46 retained introns have a functional relevance, due to which these have been evolutionarily maintained in

47 the genome, despite the loss of introns in other gene classes[4,6].

48 In recent years, almost all organisms, prokaryotic or eukaryotic, have been shown to express non-coding  
49 RNAs (ncRNAs) that carry out an ever growing set of diverse functions (reviewed in [7]). In prokaryotes,  
50 some non-coding RNAs are part of innate anti-viral defense [8] while others regulate genes involved in  
51 quorum sensing and motility (reviewed in [9]). In eukaryotes, non-coding RNAs have diverse functions:  
52 microRNAs are mediators of post-transcriptional gene regulation (reviewed in [10]), while the slightly  
53 longer piRNAs are involved in protecting genomes from transposable elements (reviewed in [11]) and  
54 long-non-coding RNAs (lncRNAs) are involved in several functions ranging from chromatin organization  
55 to structural scaffolding of proteins ([12], [13]). Intronic miRNAs and miRtrons are derived during  
56 processing of messenger RNAs and participate in dynamic regulation of gene expression [14].

57 Introns are no longer considered as non-functional regions since it is now clear that introns may harbour  
58 functional elements [6]. This, along with the fact that a few introns are selectively retained in yeast,  
59 prompted us to explore the possibility that these intronic regions may have functional implications. We  
60 used publicly available RNA-Seq data, and found sequence reads mapping to 12 introns in the  
61 *Saccharomyces cerevisiae* genome. Seven of these show significant expression levels in at least one of  
62 the reported studies. We find that these reads, four of which are derived from introns of ribosomal protein  
63 coding genes, can arise from small RNAs that can potentially bind to the rDNA locus or rRNA  
64 transcripts. These transcripts belong to the small and large subunits of the eukaryotic ribosome or  
65 mitochondrial ribosome. Further, we could detect the expression of these small intronic RNAs  
66 (henceforth referred to as isRNAs) in wild type yeast cells. In a strain where one of the introns  
67 specifically from *IMD4* gene, was deleted, the expression of the corresponding isRNA was lost. Thus,  
68 novel non-coding RNAs that could potentially target rRNA biosynthesis or ribosome assembly are  
69 derived from introns of ribosomal protein coding genes. We propose that this constitutes a primitive  
70 mechanism of feed-forward regulation that allows for coordinated expression of ribosomal proteins and  
71 rRNA.

## 72 **Materials and Methods**

73 RNA-Seq data analysis: To identify small RNAs, that potentially arise from intronic regions, we collected  
74 and downloaded publicly available RNA-Seq data from Short Read Archive (SRA) of *S. cerevisiae* in the  
75 European Nucleotide Archive (<http://www.ebi.ac.uk/ena/>). Ten RNA-Seq experiments [ENA: SRP002218  
76 [15], ENA:SRP017603 [16], ENA:SRX111550, ENA:SRX111551, ENA:SRX111552,  
77 ENA:SRX111553, ENA:SRX391768 [17], ENA:SRX506368, ENA:SRX506456, ENA: SRX525284 [18]  
78 available from the database were used for further analysis. FastQC [19] was applied initially to check the  
79 quality of RNA-Seq data. Pre-built *S. cerevisiae* genome (version R64, 2011) package was downloaded  
80 (<http://bowtie-bio.sourceforge.net/tutorial.shtml>). Subsequently, SolexaQA [20] was used to filter and  
81 trim the reads of bad quality (phred score <20). Bowtie (version 0.12.9) [21] was used to align the RNA-  
82 seq data with the reference genome (*S. cerevisiae*). We designed a computational pipeline to screen all the  
83 intronic regions to identify regions, which have a read coverage of more than 10X. We downloaded the  
84 intron sequences and their positions from yeast intron databases (<http://www.yeastgenome.org/>,  
85 <http://metarray.ucsc.edu/cgi-bin/intron/yirIntrondb> and <http://intron.ucsc.edu/yeast4.1/>). We merged all  
86 the BAM files with read coverage >10X. Subsequently we converted BAM to BED for the specific co-  
87 ordinates and filtered out alignments that are opposite to the orientation of the gene. For instance, all +  
88 strand alignments for *RPL18A* would be removed because the gene is on the negative strand. Further, read  
89 count per nucleotide for each intron was calculated and plotted.

90 Potential targets of isRNA in yeast mRNA sequences were predicted using miRanda v3.3a algorithm and  
91 RNAhybrid 2.2. A  $\Delta G$  cutoff of -30kcal/mol for putative small RNAs-ncRNA interaction was used. We  
92 found that putative small RNAs could bind to several regions of the RDN-locus. RiboVision software  
93 (<http://apollo.chemistry.gatech.edu/RiboVision/>) was used to visualize the mapping of putative small  
94 RNAs in the small subunit of rRNA and large subunit of rRNA [22]. To establish the ribosomal targets in  
95 the RDN-locus, UCSC BLAT [23] was used.

96 We re-shuffled isRNA sequences to generate 1000 scrambled sequences to explore the occurrence of  
97 target sites expected by chance. Potential targets of these thousand scrambled sequences were predicted  
98 using miRanda v3.3a algorithm with  $\Delta G$  cutoff of -30kcal/mol. The positions of potential target sites of  
99 isRNAs checked with predicted target sites of thousand scrambled sequences with permitted overlap of  
100 90%. The targets of isRNA from *COF1*, *IMD4*, *RPL28*, *RPL7B*, *RPL18A* and *RPS29A* (p-value < 0.1  
101 with 90% overlap) were found to be significantly enriched compared to corresponding scrambled  
102 sequences.

103 Experimental Validation: Total RNA was isolated using TRIzol, followed by cDNA synthesis with the  
104 oligodT linked primer (5'-CTCAATCGTACATAGAAACAGGGATCTTTTTTTTTTTTTTTTTTTT-3') in  
105 a two-step reaction using M-MuLV Reverse Transcriptase. PCR was carried out with the cDNA using  
106 gene specific forward primer (*RPL7B*-5'-TTGTTAGTATCTATTACTTG-3'; *YRA1*-5'-  
107 GACATGTTTCCCATAGCTAT-3'; *COF1*-5'TATGTCCTTTCTTTCCTCCC-3'; *RPS29A*-5'-  
108 ATCATTGCGTATGCTGGCTG-3'; *RPL18A*-5' CTGATGTGACAAATTATTGG-3'; *RPL28*-5'-  
109 TTACGGCTATAAAAGGTAAC-3'; *IMD4*-5'-TTTCTTTTCTGGCTGGGCTG-3') and a universal  
110 reverse primer (5'-CTCAATCGTACATAGAAACAGGGATC-3').

## 111 **Results**

112 We used publicly available RNA-Seq data from 10 experiments (see methods for details) to map reads to  
113 the 401 introns of *S. cerevisiae*. We selected seven putative small RNAs after filtering out candidates with  
114 less than of 10X coverage. Read depths of the seven selected cases are shown in Figure 1. In the intron of  
115 *COF1* and *RPL18A*, distinct peaks corresponding to the isRNA were seen. But in all other introns, no  
116 such peak was evident. The *IMD4* intron includes a snRNA (snR54). The abundantly expressed reads  
117 corresponding to the snRNA are clearly seen as a distinct peak within the first half of intron. At much  
118 lower levels, reads corresponding to the predicted isRNA are also seen between 260-380 nt.

119 If the predicted non-coding RNAs are functionally important, the region is likely to be conserved in  
120 related yeast. We used whole genome data for 11 related species (*Lachancea waltii*, *S. arboricola*, *S.*  
121 *bayanus*, *S. boulardii*, *S. kudriavzevii*, *S. mikatae*, *S. paradoxus*, *S. pastorianus*) to assess the conservation  
122 of these regions. All seven intronic non-coding RNA sequences were conserved in several *Sacharomyces*  
123 species, with *S. boulardii* and *S. pastorianus* showing the maximum similarity (Figure 2). We also  
124 examined the regions in the context of flanking regions to compare the degree of conservation in small  
125 RNAs with the overall level of conservation in intronic regions.

126 We validated the presence of putative small RNAs in yeast cells, by artificially tailing it using polyA  
127 polymerase and amplifying the specific product using an isRNA specific forward primer and oligodT  
128 fused to the universal reverse primer. Using this assay (Figure 3A), we could detect the presence of seven  
129 isRNAs (*RPL7B*, *YRA1*, *COF1*, *RPS29A*, *RPL18A*, *RPL28* and *IMD4*). A strain with a deletion that spans  
130 the intron of *IMD4* (originally created by J. Parenteu [4]) did not express the small RNA (Figure 3B). We  
131 also verified the presence of the isRNA derived from the intron of *RPS29A* using an RT-PCR assay with  
132 small RNA specific forward and reverse primers (Figure 3C). The observed size of the product was close  
133 to the size predicted. For instance, in the *COF1* intron (179nt), the predicted isRNA spans 82-142<sup>nd</sup>  
134 position in the intron, where an increase in reads is seen (Figure 1).

135 We further extended the analysis by using the same program to identify potential targets of the seven  
136 isRNAs in the non-protein coding genome. Several targets were found for each of the isRNAs (Table 2)  
137 in genomic regions that give rise to rRNA, tRNA or snoRNA. We noted that the target sites in rRNAs had  
138 a higher alignment score. The mature rRNAs are produced after post-transcriptional processing of long  
139 precursor RNAs transcribed from a single rDNA locus on chromosome 12 [24]. The locus consists of  
140 100-200 repeating units of 9.1kb, each consisting of a 5S and a 35S precursor which get processed to  
141 form the 18S, 5.8S and 25S rRNA. Besides these rRNA coding regions, the locus consists of Internal  
142 Transcribed Spacers (ITS1, 2); External Transcribed Spacers (ETS1, 2) and Non-Transcribed Spacer  
143 regions (NTS1, 2). Therefore, we examined these 62 potential targets in the context of the rDNA locus.

144 As shown in figure 4 the small RNAs can potentially cover a substantial region of the rDNA locus, (up to  
145 2.64kb of the 9.1kb locus; ( Supplementary File 2). To ensure that these targets may not be predicted by  
146 chance, we scrambled the isRNA sequence and predicted potential targets in the same loci. For all seven  
147 isRNA targets were found to be significantly enriched compared to corresponding scrambled sequences  
148 ( $p$ -value<0.1 with 90% overlap). The potential binding sites of the intronic small RNAs are enriched in  
149 the internal (ITS), external (ETS) and non-transcribed (NTS) spacer sequences punctuating the rDNA  
150 locus.

151 We visualized the putative binding sites in the context of the secondary structure of the rRNA scaffold by  
152 mapping the seven non-coding RNAs on the rRNA using the RiboVision software [22]. In the large  
153 subunit all except *RPS29A* derived ncRNA have potential binding sites unaffected by the secondary  
154 structures. The 5S rRNA is potentially targeted by isRNA from *RPL7B* while isRNAs from *YRA1*, *RPL28*  
155 and *RPL7B* find overlapping putative targets in the 5.8S region (Figure 4).

156 We searched for potential RNA-RNA hybrids between intronic small RNA and yeast mRNA based on  
157 predicted  $\Delta G$  of binding [25,26]. Speculating that isRNAs may also bind to protein coding transcripts, we  
158 looked for potential targets in mRNAs of ribosome biogenesis genes. Potential targets of three isRNAs  
159 (isCOF1, isIMD4, and isYRA1) were directly related to ribosomal protein or rRNA biogenesis (Table 3).  
160 A particularly interesting target is in CURI complex involved in the transcription of ribosomal genes.  
161 Rudra et al. [27] have earlier shown that IFH1 protein shuttles between the CURI complex, which is  
162 involved in pre-rRNA processing and the RAP1 containing transcriptional complex at promoters of RP  
163 genes. This shuttling has been proposed to interface between ribosomal protein production and pre-rRNA  
164 processing. Our results suggest that the intronic RNA released during the splicing of *IMD4*, *YRA1* and  
165 *COF1* mRNA can potentially bind to and regulate IFH1 mRNA (Table 3).

## 166 Discussion

167 The ribosomes are amongst the most ancient and largest multi-subunit ribonucleoprotein machinery of the  
168 cell. A dedicated transcriptional machinery, run by the highly processive RNA polymerase I, produces a  
169 6.6kb pre-rRNA transcript accounting for about 60% of the total cellular RNA transcription [28].The  
170 processing machinery then cleaves and processes this large transcript into the mature rRNA transcripts  
171 initially in the nucleus and subsequently in the cytoplasm. Folding of the rRNA, processing and assembly  
172 of ribosomal proteins are highly regulated events involving several protein factors. The production of  
173 ribosomes is closely tuned to the state of the cell by incorporating information like nutrient availability,  
174 growth, cell division and stress [29]. It is widely held that ribosomal protein production is matched to  
175 rRNA transcription and processing although the molecular basis of this crosstalk is not fully understood.

176 In prokaryotes, ribosomal protein biogenesis is coordinately regulated at the transcriptional level by a  
177 common promoter that regulates RP genes from a polycistronic transcript and at the translational level  
178 through a simple feedback by some of the ribosomal proteins that bind to the mRNA and prevent  
179 translation [30,31] . In eukaryotes, it is known that the RP genes and rRNA are coordinately regulated but  
180 they are neither clustered in the genome nor do they share obvious regulatory motifs. Here we show that  
181 ncRNA arising from the introns of ribosomal protein coding genes could potentially form this missing  
182 link in the coordinate regulation of ribosome biogenesis (Figure 5).

183 It was intuitively appealing to invoke the possibility that the small ncRNA could also modulate  
184 transcription factors and RNA processing enzymes that are involved in ribosome biogenesis. Such ability  
185 would allow feedback regulation of transcription and processing of the rRNA and ribosomal proteins.  
186 Three isRNAs, namely, isCOF1, isIMD4 and isYRA1 can potentially bind to the mRNA of two proteins,  
187 IFH1 and STB3 that are involved in regulation of rRNA or ribosomal protein genes. The *IFH1* mRNA  
188 has potential binding sites for all three isRNAs: isCOF1, ncIMD4 and isYRA1. The IFH1 protein is a  
189 critical component of two complexes that regulate ribosome biogenesis. Its presence in the transcriptional  
190 complex with RAP1 and Fhl1 triggers the rapid transcription of Ribosomal protein genes. When the  
191 transcription of RP genes is repressed, IFH1 leaves the promoter and localizes with the CURI complex



192 involved in the processing of pre-rRNA [32].*STB3* codes for a protein that binds to ribosomal RNA  
193 processing element motifs and regulates gene expression [33] and its mRNA harbors potential binding  
194 sites for ncCOF1.

195 Interestingly, in higher mammals the first intron in some ribosomal proteins has been shown to harbour a  
196 motif [34] potentially involved in the coordinate regulation of ribosome biogenesis. Recently, Chak *et al.*  
197 [35] have shown, from deep sequencing studies, that the highly repetitive rDNA arrays of *Drosophila*  
198 harbor a highly conserved non-canonical miRNA. In this context, our study also implies that previously  
199 unknown non-coding RNAs may be involved in dynamic regulation of ribosome activity in  
200 *Saccharomyces cerevisiae*.

201 A yeast cell has about 150 tandem copies of the rDNA locus. Extrapolation of the RNA-Seq data [29]  
202 suggests that there are about 50 mRNA transcripts of each ribosomal protein per cell (3000 RP gene  
203 mRNA/60,000 mRNA transcripts: [36]) , suggesting that hundreds of intronic ncRNA may be present in  
204 the cell. Furthermore, [3,6] have shown that introns are maintained in the cell even after splicing. As  
205 shown in Figure 4 the ncRNAs derived from seven introns could potentially bind to 29% of the 9.1kb  
206 rDNA locus. Thus the relative concentration of ribosomal proteins, mRNA, intronic ncRNA and rDNA  
207 locus repeats in a cell suggest that the interactions are feasible.

208 Hooks *et al.* 2016 found evolutionary conserved structures in YRA1, RPL28, RPL7A/B (exactly the same  
209 region as identified in this study), RPL18A/B and showed expression of the introns post splicing [6]. One  
210 measure of the relevance of these introns for biology would be the loss in fitness due to mutations.  
211 Parenteau *et al.* [4] through systematic deletion of introns in ribosomal proteins showed that the introns of  
212 ribosomal proteins are involved in expression of other ribosomal protein genes. None of the intron  
213 deletions resulted in lethality but several showed reduced fitness and altered expression of ribosomal  
214 protein genes. The deletion of the intron of *RPS29A* resulted in a significant loss of fitness [4] and an  
215 accumulation of the 20S precursor presumably due to reduced cleavage at D site between 18S and the

216 ITS1. In our analysis, we find that the *RPS29A* derived ncRNA has a potential binding site matching this  
217 location.

218 The ribosome has proven to be a valuable drug target in prokaryotic systems. Many potent naturally  
219 occurring antibiotics like streptomycin, penicillin and cephalosporin act by interfering the ribosome  
220 biogenesis and function. Deletion of introns in *RPS29A*, which reduced fitness, also led to reduced  
221 sensitivity of yeast to caffeine [4]. However, high conservation of ribosomal proteins and rRNA in  
222 eukaryotes prevents its use as an anti-fungal drug target. Our findings imply that novel endogenous  
223 isRNAs may bind to the rRNA and could potentially offer valuable sites for designing small molecule  
224 inhibitors of translation.

#### 225 **Competing interests**

226 The authors declare that they have no competing interests.

#### 227 **Authors' Contributions**

228 SKB designed the project. AP and BRI analyzed the data. RS carried out experimental validation. BP and  
229 SKB wrote the manuscript, VS improved the manuscript. All authors read and approved the manuscript.

#### 230 **Acknowledgments**

231 SKB acknowledges J.C. Bose National fellowship grant (GAP0093) and this work was funded by the  
232 Council of Scientific and Industrial Research (BSC0123). *IMD4* intron deletion strain was a kind gift of  
233 Julie Parenteau.

#### 234 **References**

235 [1] J.M. Cherry, E.L. Hong, C. Amundsen, R. Balakrishnan, G. Binkley, E.T. Chan, K.R. Christie, M.C.  
236 Costanzo, S.S. Dwight, S.R. Engel, D.G. Fisk, J.E. Hirschman, B.C. Hitz, K. Karra, C.J. Krieger, S.R.  
237 Miyasato, R.S. Nash, J. Park, M.S. Skrzypek, M. Simison, S. Weng, E.D. Wong, Saccharomyces  
238 Genome Database: the genomics resource of budding yeast, *Nucleic Acids Res* 40 (2012) D700-  
239 705.

- 240 [2] V. Wood, M.A. Harris, M.D. McDowall, K. Rutherford, B.W. Vaughan, D.M. Staines, M. Aslett, A. Lock,  
241 J. Bahler, P.J. Kersey, S.G. Oliver, PomBase: a comprehensive online resource for fission yeast,  
242 *Nucleic Acids Res* 40 (2012) D695-699.
- 243 [3] K.B. Hooks, D. Delneri, S. Griffiths-Jones, Intron evolution in Saccharomycetaceae, *Genome Biol Evol*  
244 6 (2014) 2543-2556.
- 245 [4] J. Parenteau, M. Durand, G. Morin, J. Gagnon, J.F. Lucier, R.J. Wellinger, B. Chabot, S.A. Elela, Introns  
246 within ribosomal protein genes regulate the production and function of yeast ribosomes, *Cell*  
247 147 (2011) 320-331.
- 248 [5] J.E. Stajich, F.S. Dietrich, S.W. Roy, Comparative genomic analysis of fungal genomes reveals intron-  
249 rich ancestors, *Genome Biol* 8 (2007) R223.
- 250 [6] N.S. Hooks KB, Parker S, Griffiths-Jones S, Delneri D., Novel Intronic RNA Structures Contribute to  
251 Maintenance of Phenotype in *Saccharomyces cerevisiae*., *Genetics*. **203** (2016) 469-481.
- 252 [7] J.S. Mattick, I.V. Makunin, Non-coding RNA, *Hum Mol Genet* 15 Spec No 1 (2006) R17-29.
- 253 [8] P. Horvath, R. Barrangou, CRISPR/Cas, the immune system of bacteria and archaea, *Science* 327  
254 (2010) 167-170.
- 255 [9] M.B. Miller, B.L. Bassler, Quorum sensing in bacteria, *Annu Rev Microbiol* 55 (2001) 165-199.
- 256 [10] R.J. Jackson, N. Standart, How do microRNAs regulate gene expression?, *Sci STKE* 2007 (2007) re1.
- 257 [11] T. Thomson, H. Lin, The biogenesis and function of PIWI proteins and piRNAs: progress and  
258 prospect, *Annu Rev Cell Dev Biol* 25 (2009) 355-376.
- 259 [12] T.R. Mercer, J.S. Mattick, Structure and function of long noncoding RNAs in epigenetic regulation,  
260 *Nat Struct Mol Biol* 20 (2013) 300-307.
- 261 [13] J.E. Wilusz, H. Sunwoo, D.L. Spector, Long noncoding RNAs: functional surprises from the RNA  
262 world, *Genes Dev* 23 (2009) 1494-1504.
- 263 [14] S. Gokhale, M. Hariharan, S.K. Brahmachari, C. Gadgil, A simple method for incorporating dynamic  
264 effects of intronic miRNA mediated regulation, *Mol Biosyst* 8 (2012) 2145-2152.
- 265 [15] R.P. Wu CY, Gifford DK, Fink GR, Control of transcription by cell size, *PLoS Biol* 8 (2010).
- 266 [16] U.B. Baker LA, Dewell S, Chait BT et al., The yeast Snt2 protein coordinates the transcriptional  
267 response to hydrogen peroxide-mediated oxidative stress. , *Mol Cell Biol* 33 (2013) 3735-3748.
- 268 [17] E.S. Subtelny AO, Chen GR, Sive H et al. , Poly(A)-tail profiling reveals an embryonic switch in  
269 translational control., *Nature* 508 (2014) 66-71.
- 270 [18] H.D. Jin M, Backues SK, Freeberg MA et al., Transcriptional regulation by Pho23 modulates the  
271 frequency of autophagosome formation., *Curr Biol* 24 (2014) 1314-1322.
- 272 [19] A. S., FastQC: a quality control tool for high throughput sequence data. ,(2010).
- 273 [20] P.D. Cox MP, Biggs PJ. , SolexaQA: At-a-glance quality assessment of Illumina second-generation  
274 sequencing data. , *BMC Bioinformatics*. (2010).
- 275 [21] T.C. Langmead B, Pop M, Salzberg SL., Ultrafast and memory-efficient alignment of short DNA  
276 sequences to the human genome. *Genome Biol.*, *Genome Biol.* **10** (2009) R25.
- 277 [22] C.R. Bernier, A.S. Petrov, C.C. Waterbury, J. Jett, F. Li, L.E. Freil, X. Xiong, L. Wang, B.L. Migliozzi, E.  
278 Hershkovits, Y. Xue, C. Hsiao, J.C. Bowman, S.C. Harvey, M.A. Grover, Z.J. Wartell, L.D. Williams,  
279 RiboVision suite for visualization and analysis of ribosomes, *Faraday Discuss* 169 (2014) 195-207.
- 280 [23] K.W. J, BLAT--the BLAST-like alignment tool, *Genome Res.* 12 (2002) 656-664.
- 281 [24] J. Venema, D. Tollervey, Ribosome synthesis in *Saccharomyces cerevisiae*, *Annu Rev Genet* 33  
282 (1999) 261-311.
- 283 [25] A.J. Enright, B. John, U. Gaul, T. Tuschl, C. Sander, D.S. Marks, MicroRNA targets in *Drosophila*,  
284 *Genome Biol* 5 (2003) R1.
- 285 [26] M. Rehmsmeier, P. Steffen, M. Hochsmann, R. Giegerich, Fast and effective prediction of  
286 microRNA/target duplexes, *RNA* 10 (2004) 1507-1517.

- 287 [27] D. Rudra, J. Mallick, Y. Zhao, J.R. Warner, Potential interface between ribosomal protein production  
288 and pre-rRNA processing, *Mol Cell Biol* 27 (2007) 4815-4824.
- 289 [28] J.L. Woolford, Jr., S.J. Baserga, Ribosome biogenesis in the yeast *Saccharomyces cerevisiae*, *Genetics*  
290 195 (2013) 643-681.
- 291 [29] H. Adhikari, P.J. Cullen, Metabolic respiration induces AMPK- and Ire1p-dependent activation of the  
292 p38-Type HOG MAPK pathway, *PLoS Genet* 10 (2014) e1004734.
- 293 [30] B. Li, J. Vilardell, J.R. Warner, An RNA structure involved in feedback regulation of splicing and of  
294 translation is critical for biological fitness, *Proc Natl Acad Sci U S A* 93 (1996) 1596-1600.
- 295 [31] S.W. Fewell, J.L. Woolford, Jr., Ribosomal protein S14 of *Saccharomyces cerevisiae* regulates its  
296 expression by binding to RPS14B pre-mRNA and to 18S rRNA, *Mol Cell Biol* 19 (1999) 826-834.
- 297 [32] Y. Zhao, K.B. McIntosh, D. Rudra, S. Schawalder, D. Shore, J.R. Warner, Fine-structure analysis of  
298 ribosomal protein gene transcription, *Mol Cell Biol* 26 (2006) 4853-4862.
- 299 [33] D. Liko, M.K. Conway, D.S. Grunwald, W. Heideman, Stb3 plays a role in the glucose-induced  
300 transition from quiescence to growth in *Saccharomyces cerevisiae*, *Genetics* 185 (2010) 797-810.
- 301 [34] H. Hu, X. Li, Transcriptional regulation in eukaryotic ribosomal protein genes, *Genomics* 90 (2007)  
302 421-423.
- 303 [35] L.L. Chak, J. Mohammed, E.C. Lai, G. Tucker-Kellogg, K. Okamura, A deeply conserved, noncanonical  
304 miRNA hosted by ribosomal DNA, *RNA* 21 (2015) 375-384.
- 305 [36] D. Zenklusen, D.R. Larson, R.H. Singer, Single-RNA counting reveals alternative modes of gene  
306 expression in yeast, *Nat Struct Mol Biol* 15 (2008) 1263-1271.

307

308 Figures

Figure 1

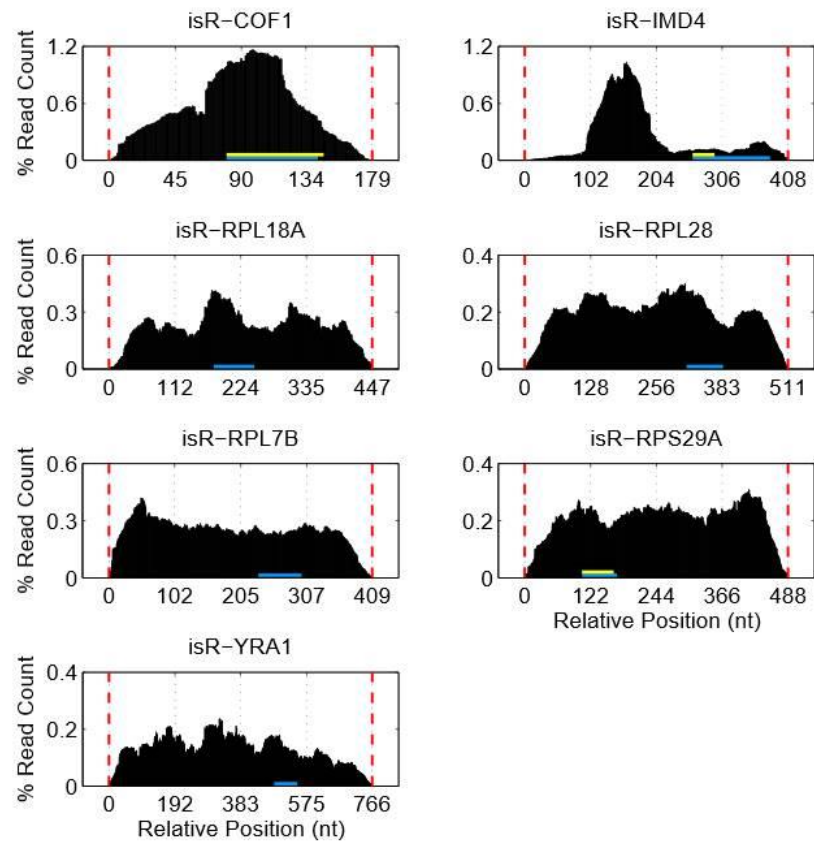

309

Figure 2

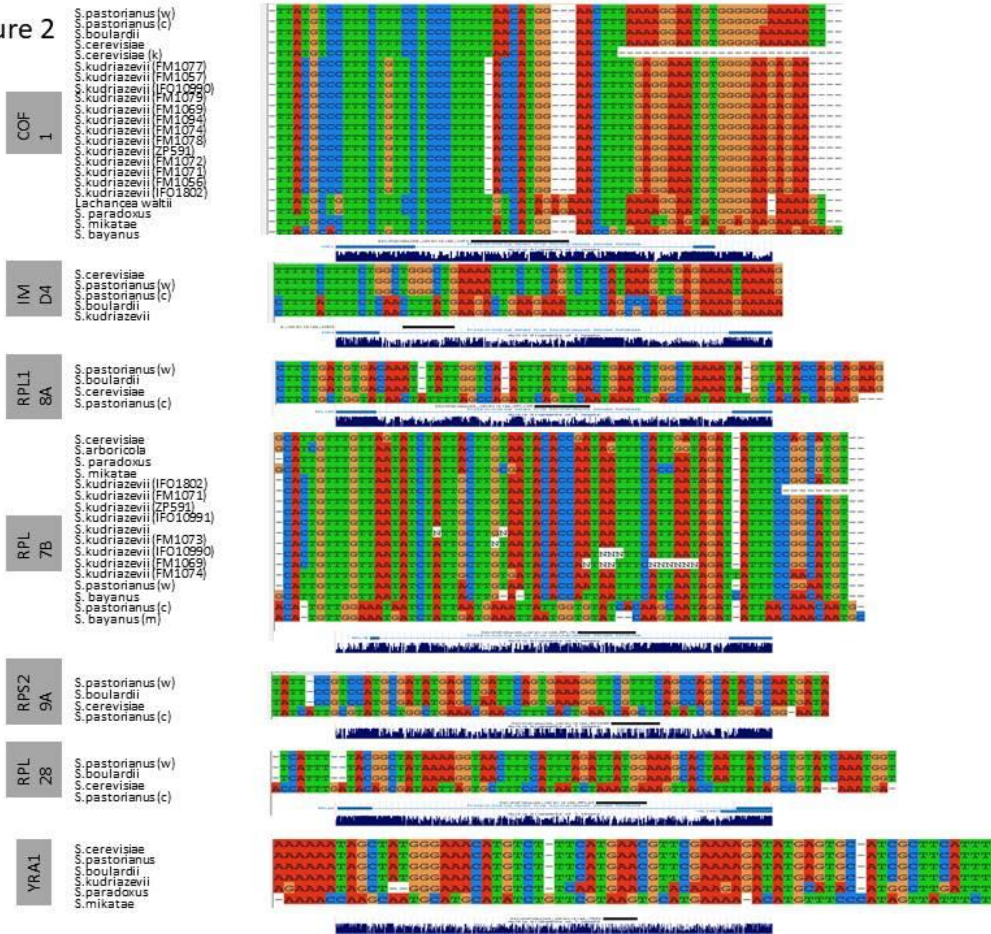

310

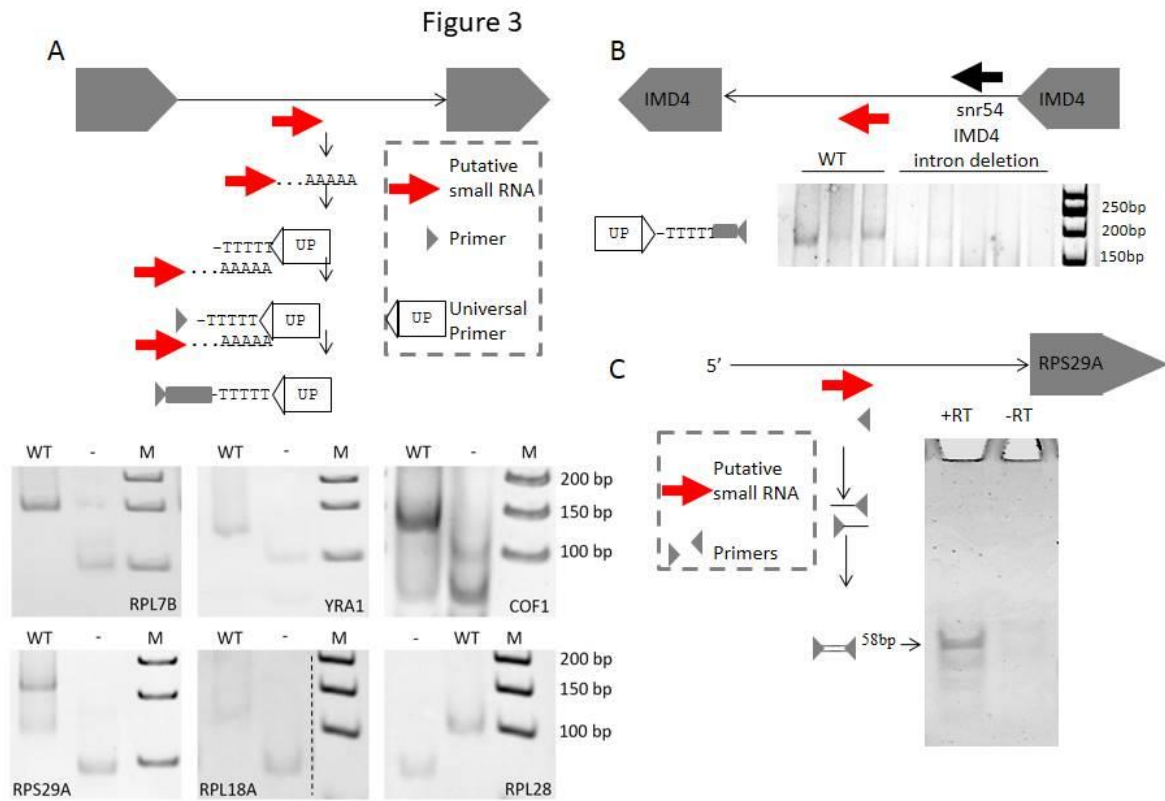

311

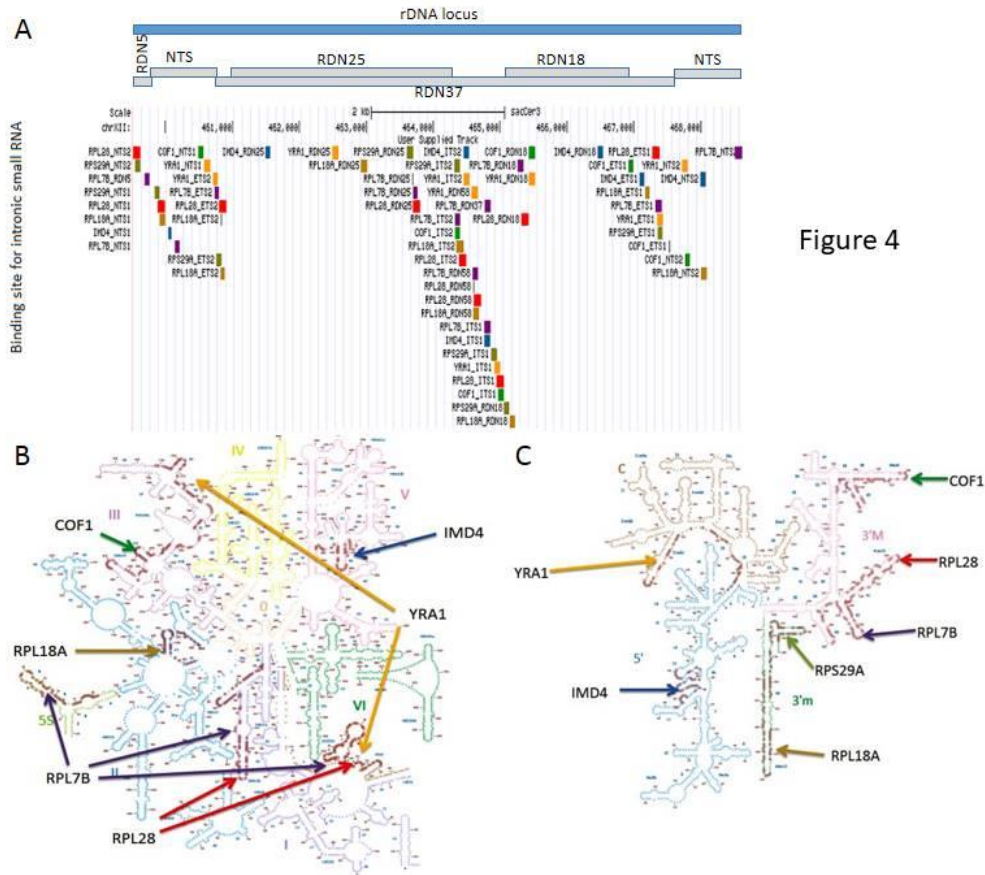

Figure 4

312



Figure 5

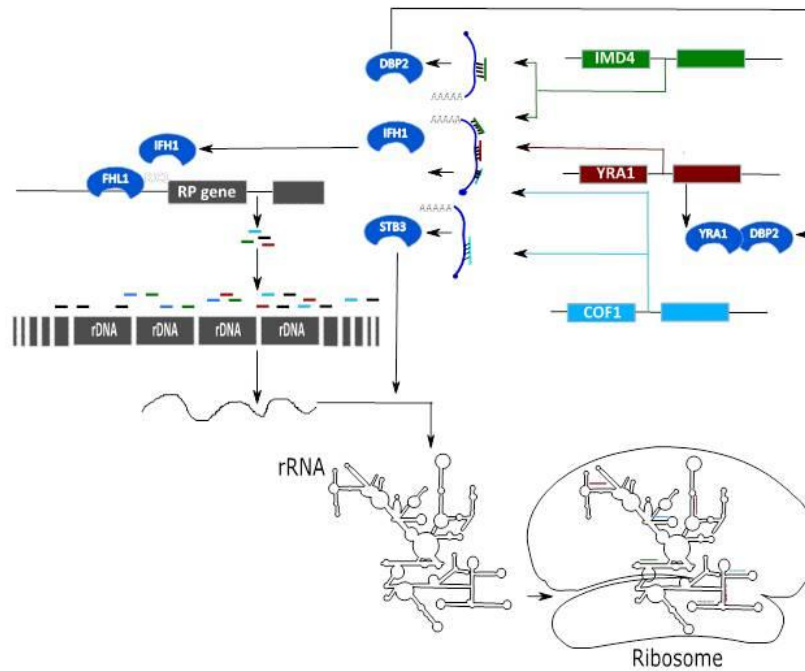

313

314 **Figure legends**

315 **Figure 1: Read depth within intronic regions.** X axis represents the relative position of the nucleotide  
 316 from start of intron and Y axis represents the percentage of read counts. Reads from several experiments  
 317 are mapped to the region between (isR-COF1) 80 to 142 nt of *COF1* gene, (isR-IMD4) 260 to 380 nt of  
 318 *IMD4* gene, (isR-RPL18A) 178 to 247 nt of *RPL18A* gene, (isR-RPL28) 314 to 385 nt of *RPL28* gene,  
 319 (isR-RPL7B) 232 to 299 nt of *RPL7B* gene, (isR-RPS29A) 106 to 171 nt of *RPS29A* gene and (isR-  
 320 YRA1) 481 to 548 nt of *YRA1* gene. Yellow horizontal arrow shows the inferred 3' end of isRNA and  
 321 blue horizontal line shows the end of bioinformatically predicted stem loop.

322 **Figure 2: Conservation of intronic region that give rise to non-coding transcripts in *S. cerevisiae*.**

323 The sequence of the non-coding transcripts in *S. cerevisiae* was used as a query to compare to genomes of  
 324 several *Saccharomyces* species. Multiple Sequence alignment of the results was done using ClustalX.  
 325 First letter of strain name is included in parentheses wherever applicable.

326 **Figure 3: Detection of small RNA from introns in yeast.** Line diagrams depict the position of the  
 327 predicted small RNA (in red), and the strategy used to detect it. (A) In the left panel, RT PCR was carried  
 328 out for the small RNA predicted from *RPL7B*, *YRA1*, *COF1*, *RPS29A*, *RPL18A*, *RPL28* and *IMD4*  
 329 (+RT).DNA contamination was ruled out by repeating the experiment in the absence of reverse  
 330 transcriptase (-RT). In the left panel, RNA from wild type strain was polyadenylated in vitro, and a  
 331 corresponding cDNA was synthesized using a universal primer.A small RNA specific primer and the

332 universal primer were used in combination to detect the small RNA. Control reactions were also carried  
333 out in the absence of reverse-transcriptase (-) to rule out the possibility of trace DNA contamination  
334 giving rise to the product. **(B)** In the right panel, RNA from wild type strain and a strain wherein the  
335 intron of *IMD4* was deleted were compared. The expected product was seen in three biological replicates  
336 (black line) of the wild type strain but not in the intron deleted *IMD4*. The PCR products were  
337 electrophoresed on 8% polyacrylamide gels and visualized by Ethidium bromide staining. **(C)** Intronic  
338 RNA from *RPS29A* was also detected at the predicted size using gene specific primers.

339 **Figure 4: A) Potential binding sites of small RNAs in rDNA locus.** Blue bars; visualized using UCSC  
340 browser. Small RNAs arising from intronic regions of different genes have been assigned specific colors  
341 (*RPL28*-red; *RPS29A*-olive; *RPL7B*-mauve, *RPL18A*-brown; *IMD4*-blue; *COF1*-green; *YRA1*-orange). For  
342 instance, the putative binding sites of the small RNA derived from *RPL28* gene (shown in red) are at  
343 NTS, ETS, ITS, RDN58, RDN18, and RDN25 regions of rDNA locus. The spacer sequences, both  
344 internal (ITS) external (ETS) and non-transcribed (NTS) punctuating the rDNA locus, are rich in putative  
345 binding sites for small RNAs. **B) Potential binding sites of small RNAs in the ribosomal RNA scaffold  
346 of the Large Subunit:** Six of seven small RNAs, labeled as per their source gene, have potential binding  
347 sites within the 5S, 5.8S and 25S subunits. **C) Potential binding sites of small RNAs in the ribosomal  
348 RNA scaffold of the Small Subunit:** All seven small RNAs, labeled as per their source gene, have  
349 potential binding sites within the 18S rRNA of the small subunit. One of the sites is potentially targeted  
350 by two overlapping small RNAs.

351 **Figure 5: A brief overview of the hypothesized regulatory network.** Small RNAs arising from intronic  
352 regions of ribosomal protein coding genes (RP genes) and *YRA1*, *COF1* and *IMD4* genes make a network.  
353 The small RNAs arising from introns of *YRA1*, *COF1* and *IMD4* can potentially target the transcription  
354 Factor IFH1, which is involved in expression of ribosomal protein genes and *STB3* involved in rRNA  
355 processing. The small RNAs from RP genes have several potential binding sites in the rDNA locus and  
356 rRNA scaffold.

357 **Table 1: Details of prediction and validation of isRNAs**

| isRNA (arising from intron of) | Intron size (nt) | Predicted RNA size (nt) |
|--------------------------------|------------------|-------------------------|
| COF1                           | 179              | 63                      |
| YRA1                           | 766              | 68                      |
| IMD4                           | 408              | 61                      |
| RPS29A                         | 487              | 66                      |
| RPL28                          | 511              | 72                      |
| RPL7B                          | 409              | 68                      |

358

359 **Table 2: Non-coding RNAs (ncRNAs) arising from intronic region interacts with other ncRNAs**

| ncRNA<br>(arising from<br>intron of) | Number of non-<br>coding target sites<br>( $\Delta G < -30$ kcal/mol) | Percent<br>of RDN<br>locus<br>covered<br>(ChrXII;<br>9.1Kb) | rRNA | tRNA | snoRNA | miscRNA<br>(snRNA,<br>lincRNA<br>etc) |
|--------------------------------------|-----------------------------------------------------------------------|-------------------------------------------------------------|------|------|--------|---------------------------------------|
| RPL28                                | 129                                                                   | 5.7%                                                        | 21   | 68   | 25     | 15                                    |
| RPL7B                                | 117                                                                   | 6.8%                                                        | 27   | 31   | 42     | 17                                    |
| RPS29A                               | 99                                                                    | 4.7%                                                        | 19   | 25   | 38     | 17                                    |
| YRA1                                 | 107                                                                   | 6.0%                                                        | 21   | 8    | 57     | 21                                    |
| COF1                                 | 58                                                                    | 3.5%                                                        | 17   | -    | 25     | 15                                    |
| RPL18A                               | 243                                                                   | 6.1%                                                        | 20   | 140  | 62     | 20                                    |
| IMD4                                 | 104                                                                   | 3.5%                                                        | 19   | 37   | 30     | 18                                    |

360

361 **Table 3: Putative interactions between non-coding RNAs and transcription factors (TF)**

| isRNA       | Target<br>Gene | mfe<br>(Kcal/mol) | Binding pattern                                                                                                                                                                                                          |
|-------------|----------------|-------------------|--------------------------------------------------------------------------------------------------------------------------------------------------------------------------------------------------------------------------|
| <i>COF1</i> | IFH1           | -39.8             | target 5' C G A GACAAUACA GCCAUGAAAAU AAU G A C UAU UG A 3'<br>UCCU UGCA UUC UUAU AGU UCCAUGU GAGAAG AGG AAAG GG G<br>AGGG GUGU AGG AAUU UCA AGGUACA UUUUUC UCC UUUC CC U<br>miRNA 3' UUA AAAA G A AA A CC UUU UG AUU 5' |
| <i>YRA1</i> | IFH1           | -42.8             | target 5' C AAAUUG AG GA GG AUC U 3'<br>AUGGAG GUAC AUCUU AACG GGAAGACG UUCCCAUA<br>UACUUC CGUG UAGAA UUGC CUUUCUGU AAGGGUAU<br>miRNA 3' UUU GCUA AGUA AAGC AAGUA ACA CGAUAAAAA 5'                                       |
| <i>IMD4</i> | IFH1           | -40.0             | target 5' A GACGUGA A UCUCA GGUA A UGAAA G C 3'<br>CUUU UUAAC AUGAAGAU UGGAGAAAAU CAG UCU C GGGGAAGA<br>GAAA AGUUG UACUUCUG ACUUCUUUAA GUC GGG G UCUUUUCU<br>miRNA 3' AUAAAAG AAA AA UC G UUUU 5'                        |

|             |      |       |                                                                   |
|-------------|------|-------|-------------------------------------------------------------------|
| <i>COFI</i> | STB3 | -38.5 | target 5' G AG CUG AUUUUAUCAUC A CAAAGACGAC UAAU U CUAU U UG A 3' |
|             |      |       | CCU AUUUUCC UUUUAAAG UUCA G UUA GAG G GGAAAG GG AUAA              |
|             |      |       | GGG UGUAAGG AAAUUUC AAGGU C AAU UUC C CCUUUC CC UAUU              |
|             |      |       | mirNA 3' UUAUUUUU GG A UU C U UUU UG 5'                           |

362

363

364

365

366
